# Supplementary material for: A Deep Learning-Aided Automated Method for Calculating Metabolic Tumor Volume in Diffuse Large B-Cell Lymphoma
Source: MDPI journal article supplement (doi:10.3390/cancers14215221), 2022-10-25
Supplement: s1 [file s1]

## Supplemental Data

| <b>Supplemental Table S1.</b> Concordance between readers in SUVmax values by scanner type                                                                         |          |                                  |                                          |                                          |
|--------------------------------------------------------------------------------------------------------------------------------------------------------------------|----------|----------------------------------|------------------------------------------|------------------------------------------|
| <b>Sample</b>                                                                                                                                                      | <b>N</b> | <b>Reader 1 vs Reader 2</b>      | <b>Reader 1 vs AM</b>                    | <b>Reader 2 vs AM</b>                    |
| <b>All</b>                                                                                                                                                         | 100      | ICC=1 p<.0001<br>(95%CI= 1 to 1) | ICC=1 p<.0001<br>(95%CI=0.99 to 1)       | ICC=1 p<.0001<br>(95%CI=0.99 to 1)       |
| <b>GE</b>                                                                                                                                                          | 30       | ICC=1 p<.0001<br>(95%CI= 1 to 1) | ICC=1 p<.0001<br>(95%CI=0.99 to 1)       | ICC=1 p<.0001<br>(95%CI=0.99 to 1)       |
| <b>Philips</b>                                                                                                                                                     | 17       | ICC=1 p<.0001<br>(95%CI= 1 to 1) | ICC=0.81 p<.0001<br>(95%CI=0.57 to 0.93) | ICC=0.81 p<.0001<br>(95%CI=0.57 to 0.93) |
| <b>Siemens</b>                                                                                                                                                     | 53       | ICC=1 p<.0001<br>(95%CI= 1 to 1) | ICC=1 p<.0001<br>(95%CI= 1 to 1)         | ICC=1 p<.0001<br>(95%CI= 1 to 1)         |
| <b>Abbreviations;</b> SUVmax, maximum standardized uptake value; AM, automated method; ICC, inter-class correlation coefficients; 95%CI, 95% confidence intervals. |          |                                  |                                          |                                          |

| <b>Supplemental Table S2.</b> Concordance between readers in MTV values by scanner type                                                              |          |                                  |                                          |                                          |
|------------------------------------------------------------------------------------------------------------------------------------------------------|----------|----------------------------------|------------------------------------------|------------------------------------------|
| <b>Sample</b>                                                                                                                                        | <b>N</b> | <b>Reader 1 vs Reader 2</b>      | <b>Reader 1 vs AM</b>                    | <b>Reader 2 vs AM</b>                    |
| <b>All</b>                                                                                                                                           | 100      | ICC=1 p<.0001<br>(95%CI= 1 to 1) | ICC=0.98 p<.0001<br>(95%CI=0.96 to 0.99) | ICC=0.98 p<.0001<br>(95%CI=0.96 to 0.99) |
| <b>GE</b>                                                                                                                                            | 30       | ICC=1 p<.0001<br>(95%CI= 1 to 1) | ICC=0.96 p<.0001<br>(95%CI=0.90 to 0.98) | ICC=0.96 p<.0001<br>(95%CI=0.90 to 0.98) |
| <b>Philips</b>                                                                                                                                       | 17       | ICC=1 p<.0001<br>(95%CI= 1 to 1) | ICC=1 p<.0001<br>(95%CI=0.96 to 1)       | ICC=1 p<.0001<br>(95%CI=0.96 to 1)       |
| <b>Siemens</b>                                                                                                                                       | 53       | ICC=1 p<.0001<br>(95%CI= 1 to 1) | ICC=0.98 p<.0001<br>(95%CI=0.96 to 0.99) | ICC=0.98 p<.0001<br>(95%CI=0.96 to 0.99) |
| <b>Abbreviations;</b> MTV, metabolic tumor volume; AM, automated method; ICC, inter-class correlation coefficients; 95%CI, 95% confidence intervals. |          |                                  |                                          |                                          |

A

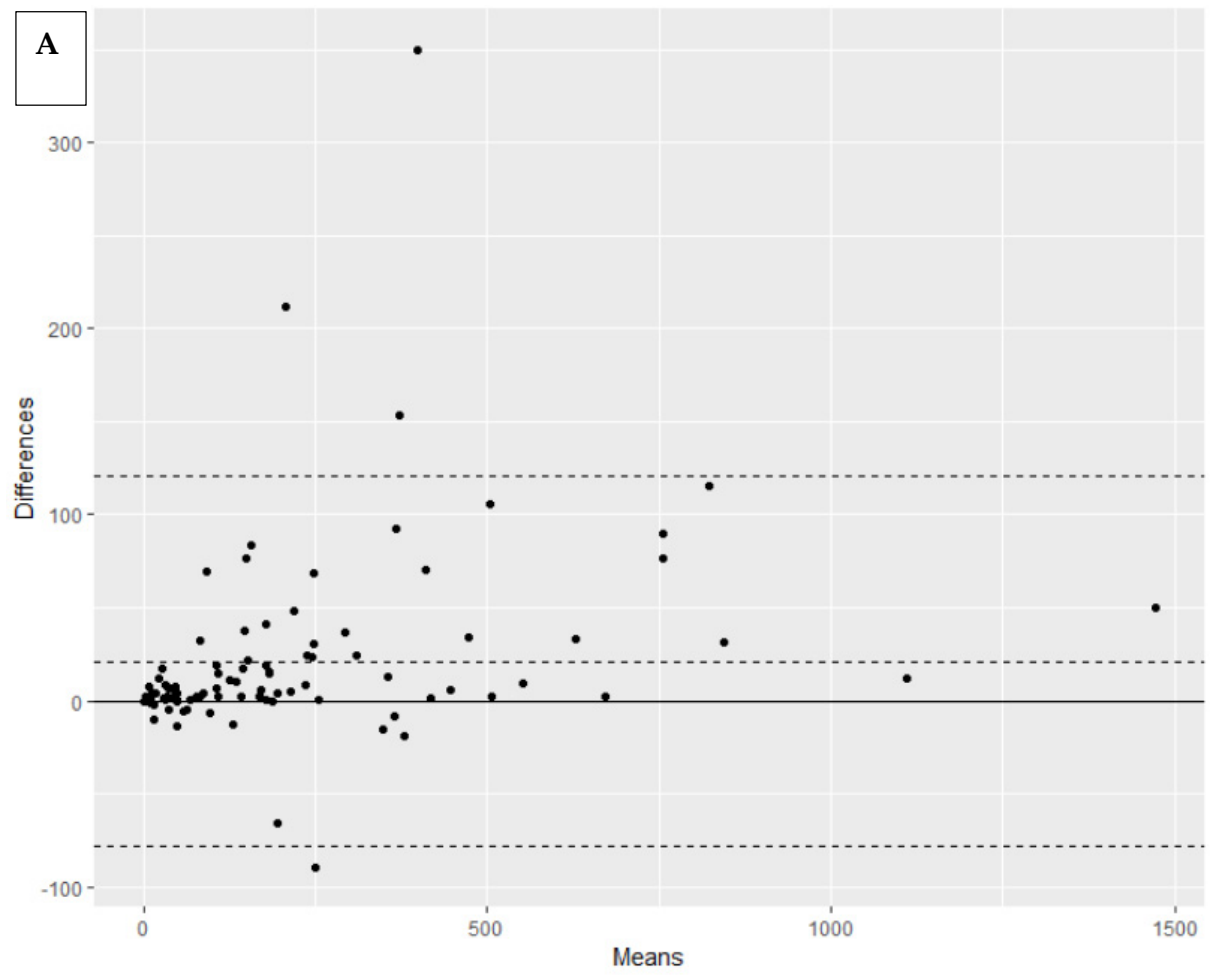

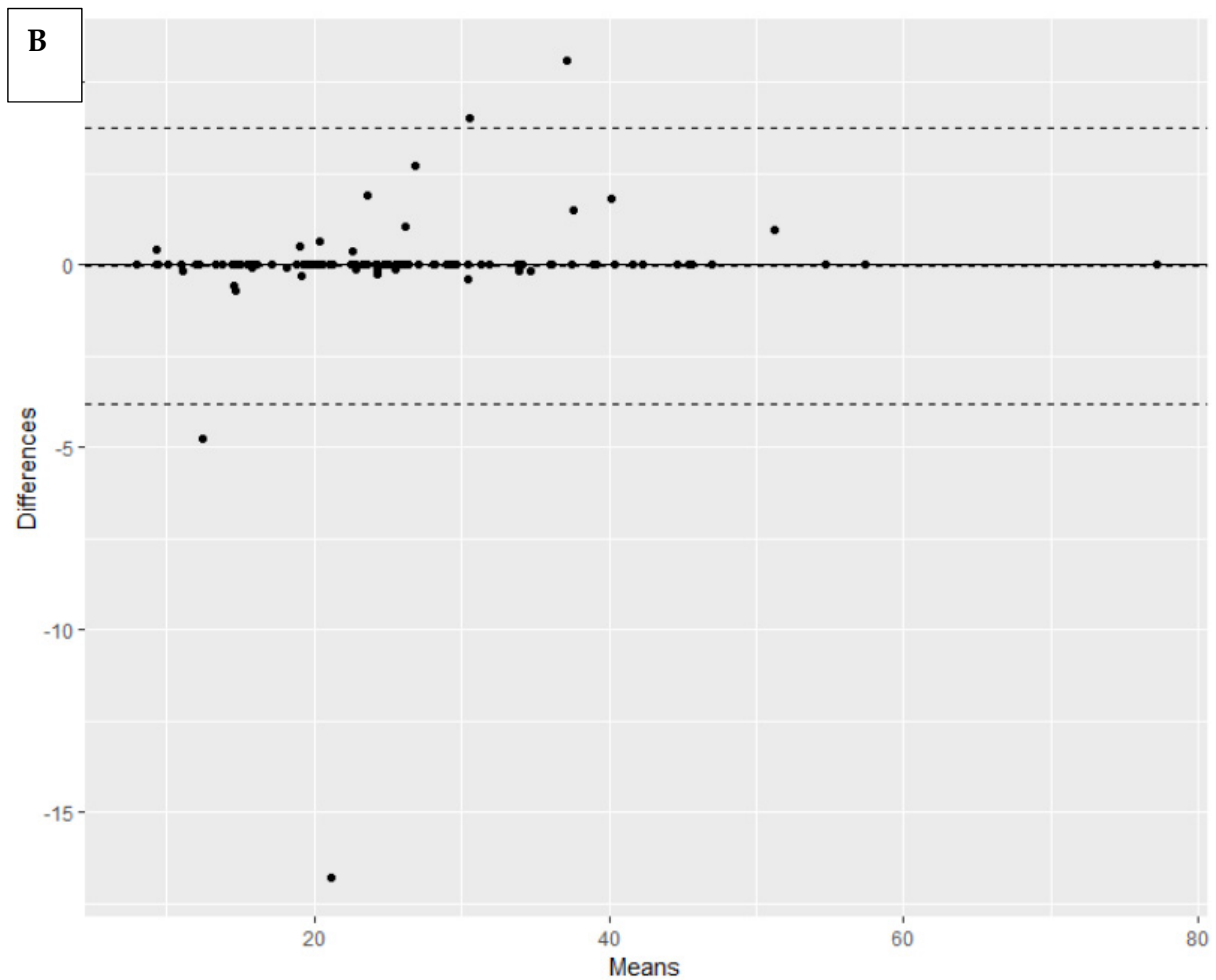

**Supplemental Figure S1.** (A). Bland-Altman plot. Graphical display for bias and Root-Mean-Squared Error (RMSE) between average of reader 1 and reader 2 versus automated method in metabolic tumor volume calculations. (B) Bland-Altman plot. Graphical display for bias and Root-Mean-Squared Error (RMSE) between average of reader 1 and reader 2 versus automated method in SUVmax calculations.
